# Supplementary material for: On/off switchable epicatechin-based ultra-sensitive MRI-visible nanotheranostics – see it and treat it
Source: Royal Society of Chemistry journal article supplement (doi:10.1039/d0bm00842g), 2020-01-01
Supplement: d0bm00842g1.pdf [file d0bm00842g1.pdf]

## Supporting Information

### **On/off Switchable Epicatechin-based ultra-sensitive MRI visible nanotheranostics – See it and treat it**

Bing Xiao,<sup>a, c, †</sup> Xiaoxuan Zhou,<sup>b, †</sup> Hongxia Xu,<sup>a</sup> Wei Zhang,<sup>a</sup> Xiaodan Xu,<sup>a</sup>  
Fengjuan Tian,<sup>b</sup> Yue Qian,<sup>b</sup> Feidan Yu,<sup>b</sup> Cailing Pu,<sup>b</sup> Hongjie Hu,<sup>b\*</sup> Zhuxian Zhou,<sup>a</sup>  
Xiangrui Liu,<sup>a</sup> Hirak K Patra,<sup>d\*</sup> Nigel Slater,<sup>d</sup> Jianbin Tang,<sup>a\*</sup> Jianqing Gao<sup>c</sup>,  
Youqing Shen<sup>a</sup>

*<sup>a</sup> Key Laboratory of Biomass Chemical Engineering of Ministry of Education, Center for Bionanoengineering, and Colledge of Chemical and Biological Engineering, Zhejiang University, Hangzhou, Zhejiang, 310027, China.*

*<sup>b</sup> Department of Radiology, Sir Run Run Shaw Hospital (SRRSH) of School of Medicine, Zhejiang University, Hangzhou, Zhejiang, 310016, China.*

*<sup>c</sup> College of Pharmaceutical Sciences, Zhejiang University, Hangzhou 310058, China*

*<sup>d</sup> Department of Chemical Engineering and Biotechnology, University of Cambridge, Cambridge, United Kingdom*

\* Corresponding Author: hongjiehu@zju.edu.cn; [hp401@cam.ac.uk](mailto:hp401@cam.ac.uk);  
[jianbin@zju.edu.cn](mailto:jianbin@zju.edu.cn) ;

† These authors equally contributed to this work.

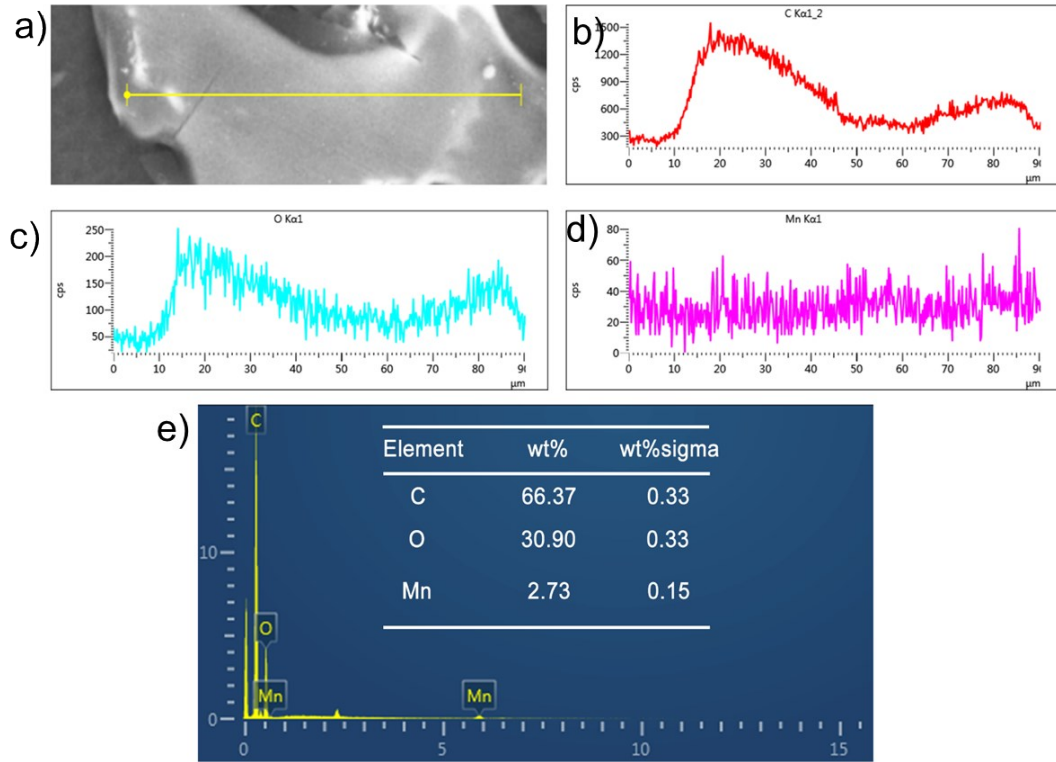

Figure S1. (a) The selective element line scanning FESEM images of PEMN and (b, c, d, e) the corresponding EDS data.

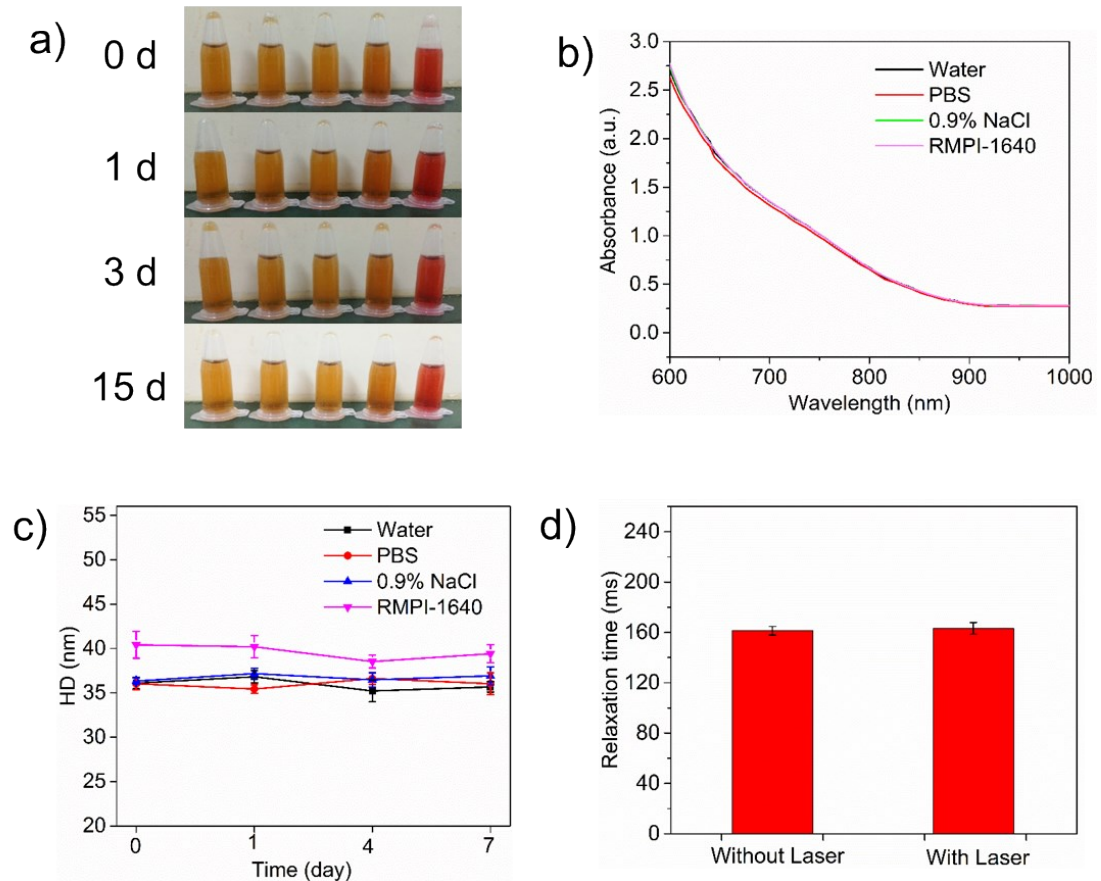

Figure S2. (a) Colloidal stability, (b) absorbance stability, (c) size stability and (d) relaxation time stability of PEMN (all at concentrations of  $2 \text{ mg mL}^{-1}$ ) dispersed in different media (water, PBS, RMPI-1640, FBS, and normal saline) over 7 days.

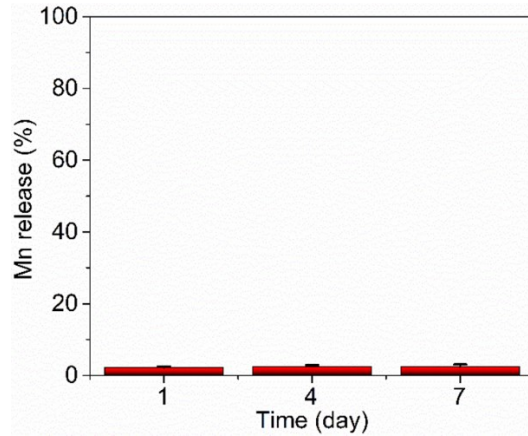

Figure S3. Mn ions released from the PEMN solution within 7 days.

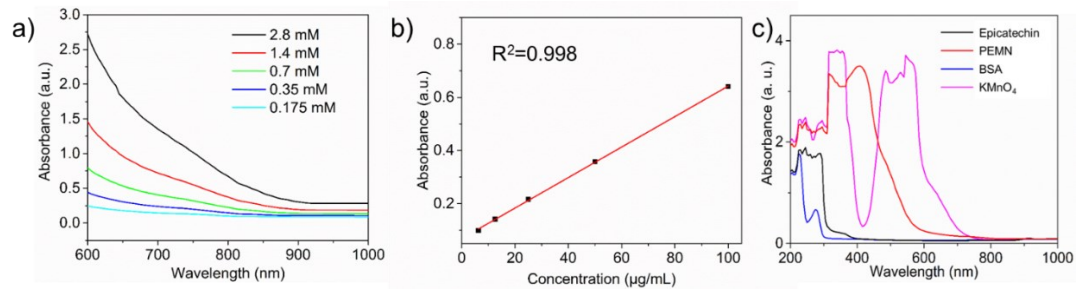

Figure S4. (a) UV-vis absorption spectra of PEMN at different concentrations. (b) The absorbance at 808 nm as a function of PEMN concentration. (c) Absorption spectra of epicatechin, PEMN, BSA, and  $\text{KMnO}_4$  solutions.

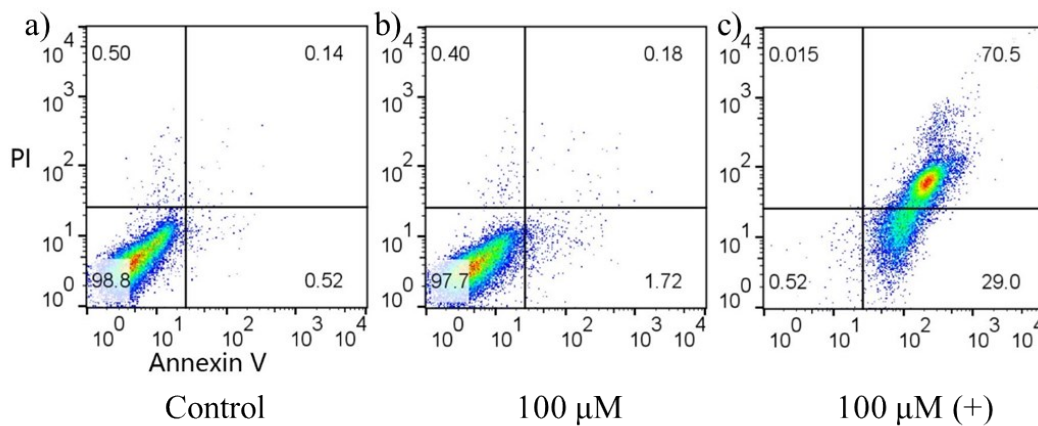

Figure S5. Flow cytometry-based apoptosis of 4T1 cells. (a) PBS only, (b) PEMN ( $100 \mu\text{M}$ ), and (c) PEMN+laser ( $808 \text{ nm}$ ,  $2 \text{ W cm}^{-2}$ ,  $5 \text{ min}$ ).

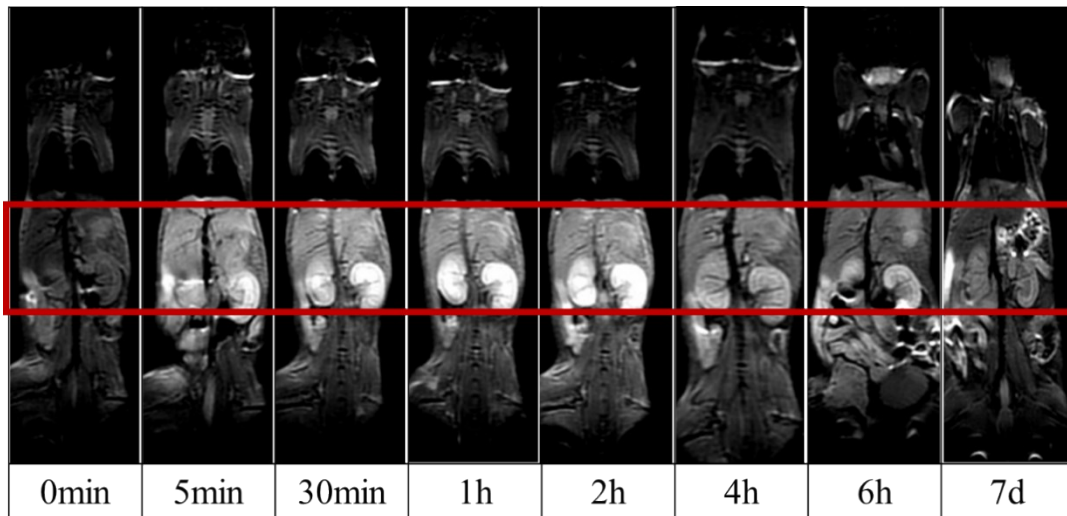

Figure S6. T1-weighted MRI of normal mice before and after administration of PEMN solutions ( $28 \mu\text{mol Kg}^{-1} \text{Mn}$ ) at different time points.

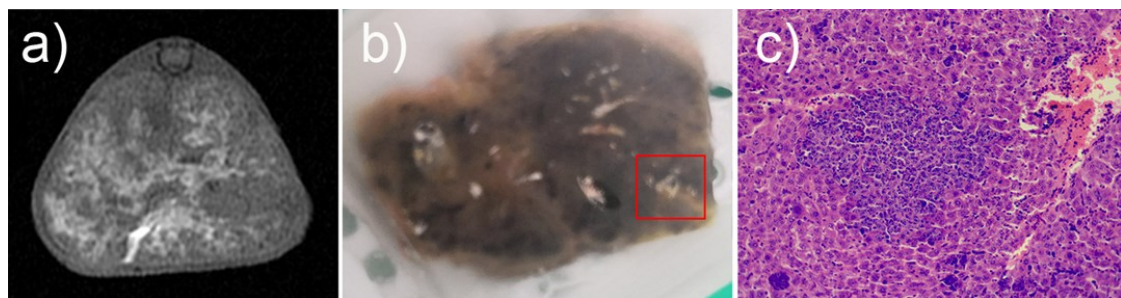

Figure S7. (a) A sectional MR image of liver metastasis and (b) a sectional of corresponding liver tissue are shown. (c) H&E staining of metastatic lesions in the liver tissue.

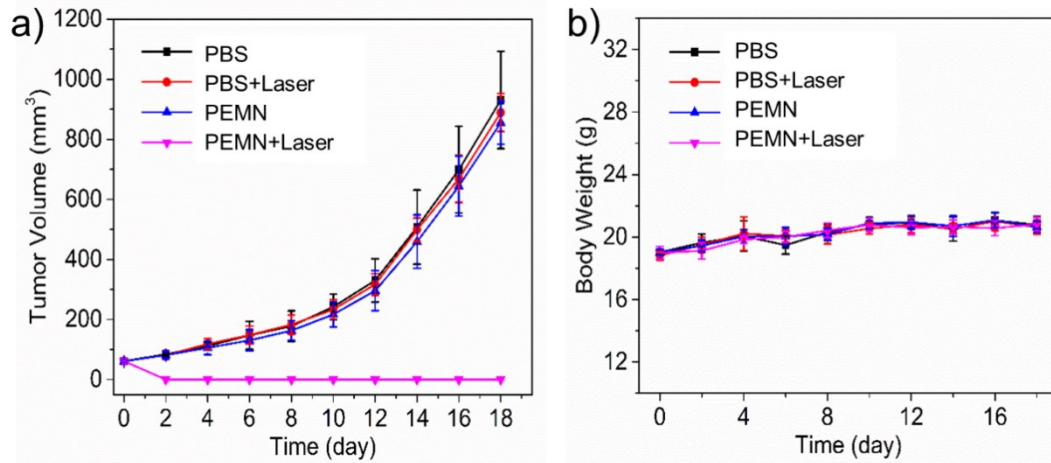

Figure S8. (a) Tumor growth profiles, (b) body weight of orthotopic 4T1 tumors in mice of various groups after different treatments (n=5). ( $28 \mu\text{mol Kg}^{-1} \text{Mn}$ ). Scale bar:  $100 \mu\text{m}$ .

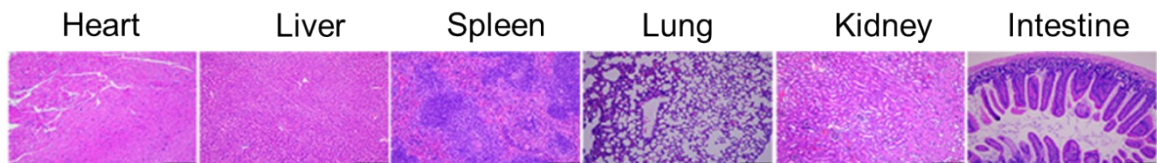

Figure S9. H&E-stained images of the major organs from PEMN-treated healthy mice post 60 days ( $28 \mu\text{mol Kg}^{-1} \text{Mn}$ ). Scale bar:  $200 \mu\text{m}$ .

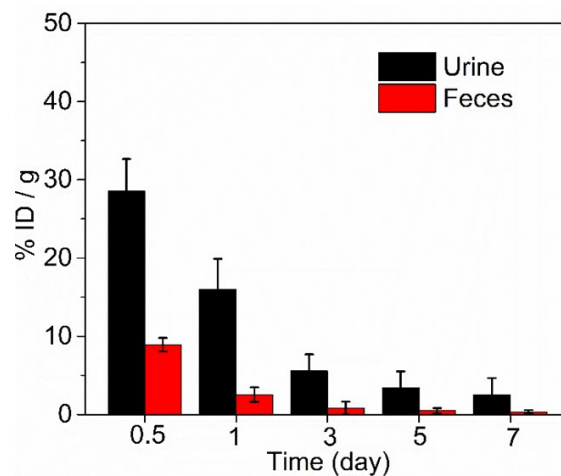

Figure S10. Excretion behaviors of PEMN in orthotopic 4T1 tumor-bearing mice.
